# Supplementary material for: Cross-sectional research into counselling for non-physician assisted suicide: who asks for it and what happens?
Source: PubMed Central journal article supplement (PMC4283078; doi:10.1186/1472-6963-14-455), 2014-10-02
Supplement: 12913_2014_3541_MOESM1_ESM.pdf [file 12913_2014_3541_MOESM1_ESM.pdf]

## Additional File 1: Appendix registration form 2012

| Item                                                                     | Selected option                                                                                                                                                                                                                                                                                                                                                                                    |
|--------------------------------------------------------------------------|----------------------------------------------------------------------------------------------------------------------------------------------------------------------------------------------------------------------------------------------------------------------------------------------------------------------------------------------------------------------------------------------------|
| 1. Personal characteristics of the client                                |                                                                                                                                                                                                                                                                                                                                                                                                    |
| Postal Code                                                              | 4 digits of Dutch postal code<br>Name of country, if abroad<br>Unknown                                                                                                                                                                                                                                                                                                                             |
| Gender                                                                   | Male<br>Female<br>Unknown                                                                                                                                                                                                                                                                                                                                                                          |
| Year of birth                                                            | 4 digits<br>Unknown                                                                                                                                                                                                                                                                                                                                                                                |
| 2. Overview of the situation of the client prior to start of counselling |                                                                                                                                                                                                                                                                                                                                                                                                    |
| Main motivation to request counselling                                   | Physical suffering<br>Psychiatric suffering<br>Psychological suffering<br>No suffering at present<br>Unknown                                                                                                                                                                                                                                                                                       |
| Current disease(s), diagnosis or situation                               | Open-ended questions. More than one answer possible.<br>Several examples preselected:<br>Physical: E.g. cancer, problems of old age, dementia, heart problems.<br>Psychiatric: E.g. depression, personality disorders, fear disorder<br>Psychological: E.g. existential suffering, loneliness, youth trauma.<br>No current suffering: E.g. wanting autonomy, completed life.<br>Unknown            |
| Severity of disease                                                      | Terminal disease<br>Severe disease<br>No severe disease<br>No disease/not applicable<br>Unknown                                                                                                                                                                                                                                                                                                    |
| Presence and urgency of death wish at start of counselling               | No death wish present<br>Death wish present, wants to end life within three months<br>Death wish present, wants to end life between 3 to 12 months<br>Death wish present, wants to end life more than one year away<br>Unknown                                                                                                                                                                     |
| Request for assistance in dying to a physician                           | No request for PAD<br>Request for PAD denied<br>Request for PAD pending<br>Request for PAD granted<br>Unknown                                                                                                                                                                                                                                                                                      |
| Explication on request                                                   | Open-ended question. More than one answer possible.<br>Several examples preselected:<br>No request: E.g. staying autonomous, not wanting to burden the physician.<br>Request denied: E.g. not meeting legal criteria of due care.<br>Request pending: E.g. physician has to think about it<br>Request granted: E.g. granted for near future, granted for in due time.<br>Unknown<br>Not applicable |
| 3. Characteristics of the counselling process (including client system)  |                                                                                                                                                                                                                                                                                                                                                                                                    |
| Number of face-to-face contacts in 2012                                  | Any number<br>Unknown                                                                                                                                                                                                                                                                                                                                                                              |
| Number of other contacts in 2012                                         | Any number<br>Unknown                                                                                                                                                                                                                                                                                                                                                                              |

|                                                            |                                                                                                                                                                                                                                                                                                                                                                                                                                                                         |
|------------------------------------------------------------|-------------------------------------------------------------------------------------------------------------------------------------------------------------------------------------------------------------------------------------------------------------------------------------------------------------------------------------------------------------------------------------------------------------------------------------------------------------------------|
| Total number of contacts in 2012                           | Calculated automatically from two prior columns                                                                                                                                                                                                                                                                                                                                                                                                                         |
| Month of first contact                                     | Jan – Dec<br>Unknown                                                                                                                                                                                                                                                                                                                                                                                                                                                    |
| Year of first contact                                      | 1995 – 2012<br>Unknown                                                                                                                                                                                                                                                                                                                                                                                                                                                  |
| Number of face-to-face contacts since start of counselling | Any number<br>Unknown                                                                                                                                                                                                                                                                                                                                                                                                                                                   |
| Number of other contacts since start of counselling        | Any number<br>Unknown                                                                                                                                                                                                                                                                                                                                                                                                                                                   |
| Total number of contacts since start of counselling        | Calculated automatically from two prior columns                                                                                                                                                                                                                                                                                                                                                                                                                         |
| Character of counselling                                   | Open-ended question. More than one answer possible.<br>Several examples preselected:<br>Referral: E.g. referral to physician, suicide prevention, End of Life Clinic<br>General information: E.g. about goals foundation, about euthanasia law.<br>Mental counselling: E.g. motivation, emotional, role of others.<br>Practical counselling: E.g. explicit information on methods, preparing,<br>Counselling ended: E.g. deceased, treatment elsewhere, continue living |
| Involvement of others during counselling                   | Yes<br>No                                                                                                                                                                                                                                                                                                                                                                                                                                                               |
| Reason for no others involved                              | Open-ended question.<br>Several examples preselected:<br>No social network/Alone<br>Fear of reactions<br>Regarded as a private matter<br>Unknown<br>Not applicable                                                                                                                                                                                                                                                                                                      |
| Relationship of others involved                            | Open-ended question. More than answer possible.<br>Several examples preselected:<br>E.g. partner, (grand)child(ren), parents, siblings, friends.<br>Not applicable                                                                                                                                                                                                                                                                                                      |
| Number of others involved                                  | Any number<br>Not applicable                                                                                                                                                                                                                                                                                                                                                                                                                                            |
| Attitude of involved others                                | Positive/Supportive<br>Negative/Critical<br>Mixed/Ambiguous<br>Unknown<br>Not applicable                                                                                                                                                                                                                                                                                                                                                                                |
| Openness about counselling towards others                  | Yes<br>No<br>Unknown                                                                                                                                                                                                                                                                                                                                                                                                                                                    |
| Reason for no openness towards others                      | Open-ended question.<br>Several examples preselected:<br>No social network/Alone<br>Fear of reactions<br>Regarded as a private matter<br>Unknown<br>Not applicable                                                                                                                                                                                                                                                                                                      |
| Relationship of other towards whom clients is open         | Open-ended question. More than answer possible.<br>Several examples preselected:<br>E.g. partner, (grand)child(ren), parents, siblings, friends.<br>Not applicable                                                                                                                                                                                                                                                                                                      |
| Number of other towards whom client is open                | Any number<br>Unknown<br>Not applicable                                                                                                                                                                                                                                                                                                                                                                                                                                 |
| Attitude of others                                         | Positive/Supportive                                                                                                                                                                                                                                                                                                                                                                                                                                                     |

|                                                   |                                                                                                                                                                                                                                                               |
|---------------------------------------------------|---------------------------------------------------------------------------------------------------------------------------------------------------------------------------------------------------------------------------------------------------------------|
| towards whom client is open                       | Negative/Critical<br>Mixed/Ambiguous<br>Unknown<br>Not applicable                                                                                                                                                                                             |
| 4. Outcome of the counselling process             |                                                                                                                                                                                                                                                               |
| See also character of counselling at 3.           | See also character of counselling at 3.                                                                                                                                                                                                                       |
| Manner of death, if client deceased.              | Not deceased<br>Unknown if deceased<br>Natural death<br>Physician-assisted dying<br>Lethal medication<br>Voluntary refusing food and fluid<br>Helium<br>Dignitas<br>Hanging/Choking<br>Jumping train<br>Jumping height<br>Drowning<br>Unknown manner of death |
| When deceased: month                              | Jan – Dec<br>Unknown<br>Not applicable                                                                                                                                                                                                                        |
| When deceased: year                               | 2011<br>2012<br>2013<br>Not applicable                                                                                                                                                                                                                        |
| Follow up counselling with bereaved ones          | Yes<br>No                                                                                                                                                                                                                                                     |
| Other information on follow up counselling        | Open- ended question.                                                                                                                                                                                                                                         |
| 5. Other                                          |                                                                                                                                                                                                                                                               |
| Additional remarks about whatever deemed relevant | Open-ended question                                                                                                                                                                                                                                           |
