# Supplementary material for: Cross-sectional research into counselling for non-physician assisted suicide: who asks for it and what happens?
Source: PubMed Central journal article supplement (PMC4283078; doi:10.1186/1472-6963-14-455), 2014-10-02
Supplement: 12913_2014_3541_MOESM2_ESM.pdf [file 12913_2014_3541_MOESM2_ESM.pdf]

**Additional File 2: Severity of illness**

(N = 595)

|                     | Frequency | Percentage |
|---------------------|-----------|------------|
| Terminal disease    | 30        | 5          |
| Severe disease      | 225       | 38         |
| No (severe) disease | 280       | 47         |
| Unknown             | 60        | 10         |
| Total N             | 595       | 100        |
