# Supplementary material for: Cross-sectional research into counselling for non-physician assisted suicide: who asks for it and what happens?
Source: PubMed Central journal article supplement (PMC4283078; doi:10.1186/1472-6963-14-455), 2014-10-02
Supplement: 12913_2014_3541_MOESM4_ESM.pdf [file 12913_2014_3541_MOESM4_ESM.pdf]

**Additional File 4: Reasons for not requesting PAD**

(only for data 2012 and if no request for PAD, N = 187)

|                                                       | Frequency | Percentage |
|-------------------------------------------------------|-----------|------------|
| Client judges PAD not possible                        | 41        | 22         |
| Client wishes to stay autonomous                      | 39        | 21         |
| Other reasons                                         | 12        | 6          |
| Clients doesn't want to burden physician              | 11        | 6          |
| PAD not discussable with physician / moral objections | 11        | 6          |
| Client has fear of being sectioned                    | 7         | 4          |
| Unknown / Missing                                     | 66        | 35         |
| Total N                                               | 187       | 100        |
