# Supplementary material for: Cross-sectional research into counselling for non-physician assisted suicide: who asks for it and what happens?
Source: PubMed Central journal article supplement (PMC4283078; doi:10.1186/1472-6963-14-455), 2014-10-02
Supplement: 12913_2014_3541_MOESM5_ESM.pdf [file 12913_2014_3541_MOESM5_ESM.pdf]

**Additional File 5: Reasons for denial of request for PAD**

(Only for data 2012, and if request for PAD denied, N = 71)

|                                           | Frequency | Percentage |
|-------------------------------------------|-----------|------------|
| Patient doesn't meet criteria of due care | 46        | 65         |
| Moral objections                          | 9         | 13         |
| Other reasons                             | 12        | 17         |
| Unknown / Missing                         | 4         | 6          |
| Total N                                   | 71        | 100        |
